# Supplementary material
Source: publisher site journal article supplement (http://www.kjim.org/upload/media/kjim-2021-214-suppl8.pdf)
Supplement: Supplementary file 1 [file kjim-2021-214-suppl8.pdf]

**Supplementary Table 6. Subgroup analyses according to weight change<sup>a</sup> for the effects of the four SHS exposure groups on new-onset hypertension in the overall population**

|                                             | Person-years | No. of events | Incidence rate,<br>10,000 person-years | Hazard ratio<br>(95% confidence interval)<br>Multivariable model |
|---------------------------------------------|--------------|---------------|----------------------------------------|------------------------------------------------------------------|
| <b>Weight reduction &gt; 1 kg</b>           |              |               |                                        |                                                                  |
| No SHS exposure <sup>d</sup>                | 36,399       | 324           | 89.0                                   | 1                                                                |
| New SHS exposure <sup>d</sup>               | 2,244        | 23            | 102.5                                  | 1.30 (0.80–2.10)                                                 |
| Former SHS exposure <sup>d</sup>            | 8,206        | 70            | 85.3                                   | 0.67 (0.49–0.91)                                                 |
| Sustained SHS exposure <sup>d</sup>         | 3,887        | 46            | 118.4                                  | 1.16 (0.81–1.66)                                                 |
| <b>Weight change –1 to 1 kg</b>             |              |               |                                        |                                                                  |
| No SHS exposure <sup>d</sup>                | 45,946       | 302           | 65.7                                   | 1                                                                |
| New SHS exposure <sup>d</sup>               | 2,534        | 23            | 90.8                                   | 1.76 (1.13–2.73) <sup>c</sup>                                    |
| Former SHS exposure <sup>d</sup>            | 10,151       | 89            | 87.7                                   | 1.08 (0.83–1.41)                                                 |
| Sustained SHS exposure <sup>d</sup>         | 4,175        | 50            | 119.8                                  | 1.46 (1.03–2.06) <sup>b</sup>                                    |
| <b>Weight gain &gt; 1 kg</b>                |              |               |                                        |                                                                  |
| No SHS exposure <sup>d</sup>                | 90,805       | 723           | 79.6                                   | 1                                                                |
| New SHS exposure <sup>d</sup>               | 5,515        | 60            | 108.8                                  | 1.17 (0.88–1.56)                                                 |
| Former SHS exposure <sup>d</sup>            | 22,386       | 206           | 92.0                                   | 0.87 (0.73–1.03)                                                 |
| Sustained SHS exposure <sup>d</sup>         | 8,557        | 91            | 106.4                                  | 1.04 (0.81–1.33)                                                 |
| <b>Interaction p value by weight change</b> |              |               |                                        | 0.231                                                            |

Multivariable model was adjusted for age, sex, body mass index, waist circumference, vigorous exercise ( $\geq 5$  times/week), alcohol consumption, presence of diabetes, creatinine, uric acid, total cholesterol, high density lipoprotein cholesterol, low density lipoprotein cholesterol, triglycerides, and high-sensitivity C-reactive protein.

SHS, secondhand smoke.

<sup>a</sup>Weight change was assessed by subtracting weight at baseline from that at follow-up, and was categorized as weight reduction (> 1 kg), no change, weight gain (> 1 kg) for subgroup analysis.

<sup>b</sup> $p < 0.05$ .

<sup>c</sup> $p < 0.01$ .

<sup>d</sup>The reference group was no SHS exposure group. No SHS exposure group was defined as individuals without SHS exposure both at baseline and at follow-up; New SHS exposure group as those without SHS exposure at baseline and with SHS exposure at follow-up; Former SHS exposure group as those with SHS exposure at baseline and without SHS exposure at follow-up; Sustained SHS exposure group as those with SHS exposure both at baseline and at follow-up.
